# Supplementary material for: Six-Year Prescription Pattern of Antimicrobial Use in Cats at the Veterinary Teaching Hospital of the University of Pisa
Source: MDPI journal article supplement (doi:10.3390/ani14030521), 2024-02-05
Supplement: s1 [file s1]

**Table S1.** Complete information of distribution of antimicrobial classes prescribed from 2017 through 2022. Percentages were calculated on the total prescribed antimicrobial classes per year. \*  $p < 0.05$ ; \*\*  $p < 0.01$ ; \*\*\*  $p < 0.001$ ; \*\*\*\*  $p < 0.0001$ .

|                                                                      | 2017<br>n (%)    | 2018<br>n (%)       | 2019<br>n (%)         | 2020<br>n (%)    | 2021<br>n (%)    | 2022<br>n (%)         | Tot 6 y<br>n (%)  | p-Value<br>Trend  |
|----------------------------------------------------------------------|------------------|---------------------|-----------------------|------------------|------------------|-----------------------|-------------------|-------------------|
| <b>Aminoglycosides</b>                                               | <b>6 (3.6)</b>   | <b>11 (4.3)</b>     | <b>5 (5.4)</b>        | <b>1 (3.4)</b>   | <b>2 (3.7)</b>   | <b>1 (1.3)</b>        | <b>26 (3.9)</b>   | <b>&lt;0.001</b>  |
| Tobramycin                                                           | 3 (1.8)          | 9 (3.5)             | 3 (3.3)               | 1 (3.4)          | 2 (3.7)          | 1 (1.3)               | 19 (2.8)          |                   |
| Gentamicin                                                           | 2 (1.2)          | 1 (0.4)             | 1 (1.1)               | -                | -                | -                     | 4 (0.6)           |                   |
| Paromomycin                                                          | -                | -                   | 1 (1.1)               | -                | -                | -                     | 1 (0.1)           |                   |
| Neomycin                                                             | 1 (0.6)          | 1 (0.4)             | -                     | -                | -                | -                     | 2 (0.3)           |                   |
| <b>Cephalosporins</b>                                                | <b>20 (11.9)</b> | <b>25 (9.8)</b>     | <b>9 (9.7)</b>        | <b>1 (3.4)</b>   | <b>0 (0.0)</b>   | <b>2 (2.6)</b>        | <b>57 (8.4)</b>   | <b>&lt;0.0001</b> |
| Cephalexin                                                           | 12 (7.2)         | 11 (4.3)            | 5 (5.4)               | 1 (3.4)          | -                | 1 (1.3)               | 30 (4.4)          |                   |
| Cefadroxil                                                           | 4 (2.4)          | 4 (1.6)             | -                     | -                | -                | 0 (0.0)               | 8 (1.2)           |                   |
| Ceftriaxone                                                          | 4 (2.4)          | 10 (3.9)            | 4 (4.3)               | -                | -                | -                     | 18 (2.7)          |                   |
| Cefovecin                                                            | -                | -                   | -                     | -                | -                | 1 (1.3)               | 1 (0.1)           |                   |
| <b>Fixed-dose combination</b>                                        | <b>79 (47.3)</b> | <b>103 (40.2)</b>   | <b>50 (54.3) *</b>    | <b>13 (44.8)</b> | <b>27 (50.0)</b> | <b>51 (66.2) ****</b> | <b>323 (47.9)</b> | <b>&lt;0.0001</b> |
| Amoxicillin-clavulanic acid <sup>a</sup>                             | 49 (29.3)        | 76 (29.7)           | 48 (52.2)             | 13 (44.8)        | 27 (50.0)        | 51 (66.2) ****        | 264 (39.1)        |                   |
| Bacitracin-neomycin sulfate <sup>b</sup>                             | 1 (0.6)          | -                   | -                     | -                | -                | -                     | 1 (0.1)           |                   |
| Chloramphenicol-Colistimethate Sodium-Rolitetraacycline <sup>c</sup> | -                | 5 (2.0)             | -                     | -                | -                | -                     | 5 (0.7)           |                   |
| Spiramycin-metronidazole <sup>d</sup>                                | 29 (17.4)        | 22 (8.6)            | 2 (2.2)               | -                | -                | -                     | 53 (7.9)          |                   |
| <b>Fluoroquinolones</b>                                              | <b>51 (30.5)</b> | <b>83 (32.4) **</b> | <b>21 (22.8) ****</b> | <b>11 (37.9)</b> | <b>15 (27.8)</b> | <b>20 (26.0)</b>      | <b>201 (29.8)</b> | <b>&lt;0.0001</b> |
| Enrofloxacin                                                         | 45 (26.9)        | 71 (27.7)           | 16 (17.4)             | 10 (34.5)        | 15 (27.8)        | 12 (15.6)             | 169 (25.0)        |                   |
| Marbofloxacin                                                        | 6 (3.6)          | 6 (2.3)             | 4 (4.3)               | 1 (3.4)          | -                | 7 (9.1)               | 24 (3.6)          |                   |
| Orbifloxacin                                                         | -                | -                   | -                     | -                | -                | 1 (1.3)               | 1 (0.1)           |                   |
| Ofloxacin                                                            | -                | 4 (1.6)             | -                     | -                | -                | -                     | 4 (0.6)           |                   |
| Pradofloxacin                                                        | -                | 2 (0.8)             | 1 (1.1)               | -                | -                | -                     | 3 (0.4)           |                   |
| <b>Fusidic Acid</b>                                                  | <b>1 (0.6)</b>   | <b>2 (0.8)</b>      | <b>0 (0.0)</b>        | <b>0 (0.0)</b>   | <b>0 (0.0)</b>   | <b>0 (0.0)</b>        | <b>3 (0.4)</b>    | <b>&lt;0.05</b>   |
| <b>Lincosamides</b>                                                  | <b>2 (1.2)</b>   | <b>6 (2.3)</b>      | <b>1 (1.1)</b>        | <b>0 (0.0)</b>   | <b>1 (1.9)</b>   | <b>1 (1.3)</b>        | <b>11 (1.6)</b>   | <b>&lt;0.05</b>   |
| Clindamycin                                                          | 2 (1.2)          | 6 (2.3)             | 1 (1.1)               | -                | 1 (1.9)          | 1 (1.3)               | 11 (1.6)          |                   |
| <b>Nitroimidazoles</b>                                               | <b>0 (0.0)</b>   | <b>9 (3.5) ****</b> | <b>0 (0.0)</b>        | <b>0 (0.0)</b>   | <b>0 (0.0)</b>   | <b>0 (0.0)</b>        | <b>9 (1.3)</b>    | <b>&lt;0.01</b>   |
| Metronidazole                                                        | -                | 9 (3.5)             | -                     | -                | -                | -                     | 9 (1.3)           |                   |
| <b>Penicillins</b>                                                   | <b>1 (0.6)</b>   | <b>0 (0.0)</b>      | <b>0 (0.0)</b>        | <b>0 (0.0)</b>   | <b>0 (0.0)</b>   | <b>0 (0.0)</b>        | <b>1 (0.1)</b>    | <b>0.11</b>       |
| Ampicillin                                                           | 1 (0.6)          | -                   | -                     | -                | -                | -                     | 1 (0.1)           |                   |
| <b>Phenicol</b>                                                      | <b>1 (0.6)</b>   | <b>1 (0.4)</b>      | <b>0 (0.0)</b>        | <b>0 (0.0)</b>   | <b>0 (0.0)</b>   | <b>0 (0.0)</b>        | <b>2 (0.3)</b>    | <b>0.07</b>       |
| Chloramphenicol                                                      | 1 (0.6)          | 1 (0.4)             | -                     | -                | -                | -                     | 2 (0.3)           |                   |
| <b>Polymyxins</b>                                                    | <b>1 (0.6)</b>   | <b>3 (1.2)</b>      | <b>2 (2.2)</b>        | <b>1 (3.4)</b>   | <b>0 (0.0)</b>   | <b>0 (0.0)</b>        | <b>7 (1.0)</b>    | <b>0.07</b>       |
| Polymyxin B                                                          | 1 (0.6)          | 3 (1.2)             | 2 (2.2)               | 1 (3.4)          | -                | -                     | 7 (1.0)           |                   |

|                      |                      |                      |                     |                          |                        |                       |                      |                   |
|----------------------|----------------------|----------------------|---------------------|--------------------------|------------------------|-----------------------|----------------------|-------------------|
| <b>Tetracyclines</b> | <b>5 (3.0)</b>       | <b>13 (5.1)</b>      | <b>4 (4.3)</b>      | <b>2 (6.9)</b>           | <b>9 (16.7) *</b>      | <b>2 (2.6) *</b>      | <b>35 (5.2)</b>      | 0.11              |
| Doxycycline          | 5 (3.0)              | 13 (5.1)             | 3 (3.3)             | 2 (6.9)                  | 9 (16.7)               | 2 (2.6)               | 34 (5.0)             |                   |
| Tetracycline         | -                    | -                    | 1 (1.1)             | -                        | -                      | -                     | 1 (0.1)              |                   |
| <b>Total</b>         | <b>167<br/>(100)</b> | <b>256<br/>(100)</b> | <b>92<br/>(100)</b> | <b>29<br/>(100) ****</b> | <b>54<br/>(100) **</b> | <b>77<br/>(100) *</b> | <b>675<br/>(100)</b> | <b>&lt;0.0001</b> |

<sup>a</sup> Synulox; <sup>b</sup> Bimixin; <sup>c</sup> Colbiocin; <sup>d</sup> Stomorgyl

**Table S2.** Complete information of antimicrobial prescriptions by route in the total 6-year period. Percentages were calculated on the total 6-year prescriptions.

|                                           | Route of administration |                 |                 |
|-------------------------------------------|-------------------------|-----------------|-----------------|
|                                           | Oral                    | Parenteral      | Topical         |
|                                           | n (%)                   | n (%)           | n (%)           |
| <b>Aminoglycosides</b>                    | <b>1 (0.1)</b>          | <b>0 (0.0)</b>  | <b>25 (3.7)</b> |
| Tobramycin                                | -                       | -               | 19 (2.8)        |
| Gentamicin                                | -                       | -               | 4 (0.6)         |
| Paromomycin                               | 1 (0.1)                 | -               | -               |
| Neomycin                                  | -                       | -               | 2 (0.3)         |
| <b>Cephalosporins</b>                     | <b>38 (5.6)</b>         | <b>19 (2.8)</b> | <b>0 (0.0)</b>  |
| Cephalexin                                | 30 (4.4)                | -               | -               |
| Cefadroxil                                | 8 (1.2)                 | -               | -               |
| Ceftriaxone                               | -                       | 18 (2.7)        | -               |
| Cefovecin                                 | -                       | 1 (0.1)         | -               |
| <b>Fixed-dose combinations</b>            | <b>306 (45.3) ****</b>  | <b>12 (1.8)</b> | <b>5 (0.7)</b>  |
| Amoxicillin-clavulanic acid <sup>a</sup>  | 252 (37.2)              | 12 (1.8)        | -               |
| Bacitracin- neomycin sulfate <sup>b</sup> | 1 (0.1)                 | -               | -               |
| Chloramphenicol-Colistimethate            | -                       | -               | 5 (0.7)         |
| Sodium-Rolitetracycline <sup>c</sup>      | -                       | -               | -               |
| Spiramycin-metronidazole <sup>d</sup>     | 53 (7.9)                | -               | -               |
| <b>Fluoroquinolones</b>                   | <b>186 (27.4) ****</b>  | <b>10 (1.5)</b> | <b>5 (0.7)</b>  |
| Enrofloxacin                              | 164 (24.1)              | 5 (0.7)         | -               |
| Marbofloxacin                             | 19 (2.8)                | 5 (0.7)         | -               |
| Orbifloxacin                              | -                       | -               | 1 (0.1)         |
| Ofloxacin                                 | -                       | -               | 4 (0.6)         |
| Pradofloxacin                             | 3 (0.4)                 | -               | -               |
| <b>Lincosamides</b>                       | <b>11 (1.6)</b>         | <b>0 (0.0)</b>  | <b>0 (0.0)</b>  |
| Clindamycin                               | 11 (1.6)                | -               | -               |
| <b>Penicillins</b>                        | <b>1 (0.1)</b>          | <b>0 (0.0)</b>  | <b>0 (0.0)</b>  |
| Ampicillin                                | 1 (0.1)                 | -               | -               |
| <b>Phenicals</b>                          | <b>0 (0.0)</b>          | <b>0 (0.0)</b>  | <b>2 (0.3)</b>  |
| Chloramphenicol                           | -                       | -               | 2 (0.3)         |
| <b>Polymyxins</b>                         | <b>0 (0.0)</b>          | <b>0 (0.0)</b>  | <b>7 (1.0)</b>  |
| Polymyxin B                               | -                       | -               | 7 (1.0)         |
| <b>Nitroimidazoles</b>                    | <b>9 (1.3)</b>          | <b>0 (0.0)</b>  | <b>0 (0.0)</b>  |
| Metronidazole                             | 9 (1.3)                 | -               | -               |

|                      |                        |                 |                 |
|----------------------|------------------------|-----------------|-----------------|
| <b>Tetracyclines</b> | <b>36 (5.3)</b>        | <b>0 (0.0)</b>  | <b>1 (0.1)</b>  |
| Doxycycline          | 34 (5.0)               | -               | -               |
| Tetracycline         | -                      | -               | 1 (0.1)         |
| <b>Others</b>        | <b>0 (0.0)</b>         | <b>0 (0.0)</b>  | <b>3 (0.4)</b>  |
| Fusidic acid         | -                      | -               | 3 (0.4)         |
| <b>Total</b>         | <b>586 (86.8) ****</b> | <b>41 (6.1)</b> | <b>48 (7.1)</b> |

<sup>a</sup> Synulox; <sup>b</sup> Bimixin; <sup>c</sup> Colbiocin; <sup>d</sup> Stomorgyl
